# Supplementary material for: ADAMTS18 Deficiency Leads to Pulmonary Hypoplasia and Bronchial Microfibril Accumulation
Source: PubMed Central journal article supplement — iScience. 2020 Aug 20;23(9):101472. doi: 10.1016/j.isci.2020.101472 (PMC7476315; doi:10.1016/j.isci.2020.101472), 2020-08-20
Supplement: mmc1.pdf [file mmc1.pdf]

iScience, Volume 23

## **Supplemental Information**

### **ADAMTS18 Deficiency Leads to Pulmonary Hypoplasia and Bronchial Microfibril Accumulation**

**Tiantian Lu, Xiaotian Lin, Yi-Hsuan Pan, Ning Yang, Shuai Ye, Qi Zhang, Caiyun Wang, Rui Zhu, Tianhao Zhang, Thomas M. Wisniewski, Zhongwei Cao, Bi-Sen Ding, Suying Dang, and Wei Zhang**

## Supplemental Figures

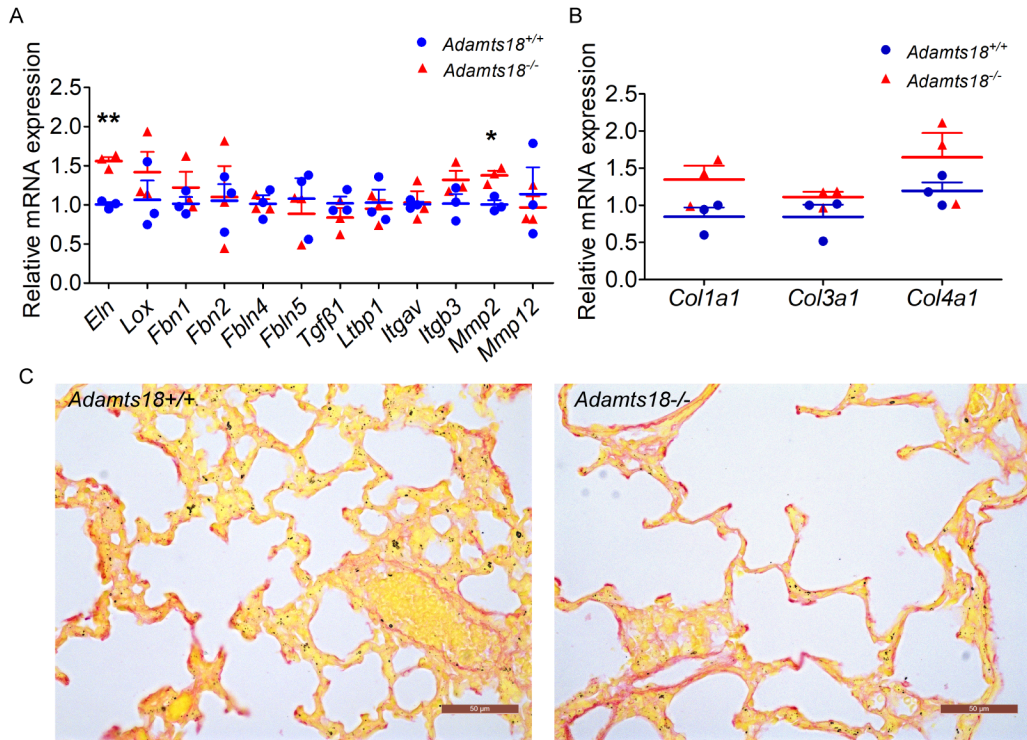

**Figure S1. Effect of *Adamts18* on elastin and collagen in the lungs of two-week-old mice, related to Figure 3 and Table S5.** **A)** qRT-PCR results of key proteins involved in elastic fiber synthesis, assembly, and degradation, including *Tropoelastin* (*Eln*), *Lox*, *Fibrillin 1* (*Fbn1*), *Fibrillin 2* (*Fbn2*), *Fibulin 4* (*Fbln4*), *Fibulin 5* (*Fbln5*), *Tgfb1*, *Ltbp1*, *Integrin  $\alpha$ 5* (*Itga5*), *Integrin  $\beta$ 3* (*Itga3*), *Mmp2*, and *Mmp12*. **B)** qRT-PCR results of *Colla1*, *Col3a1*, and *Col4a1*. **C)** Lung collagen revealed by Sirius red staining. Scale bar, 50  $\mu$ m. The relative quantity of target mRNA was normalized to that of the housekeeping gene *Gapdh* using the  $\Delta\Delta C_t$  method. Data are expressed as mean  $\pm$  s.d. Statistical significance: \* $P < 0.05$ ; \*\* $P < 0.01$

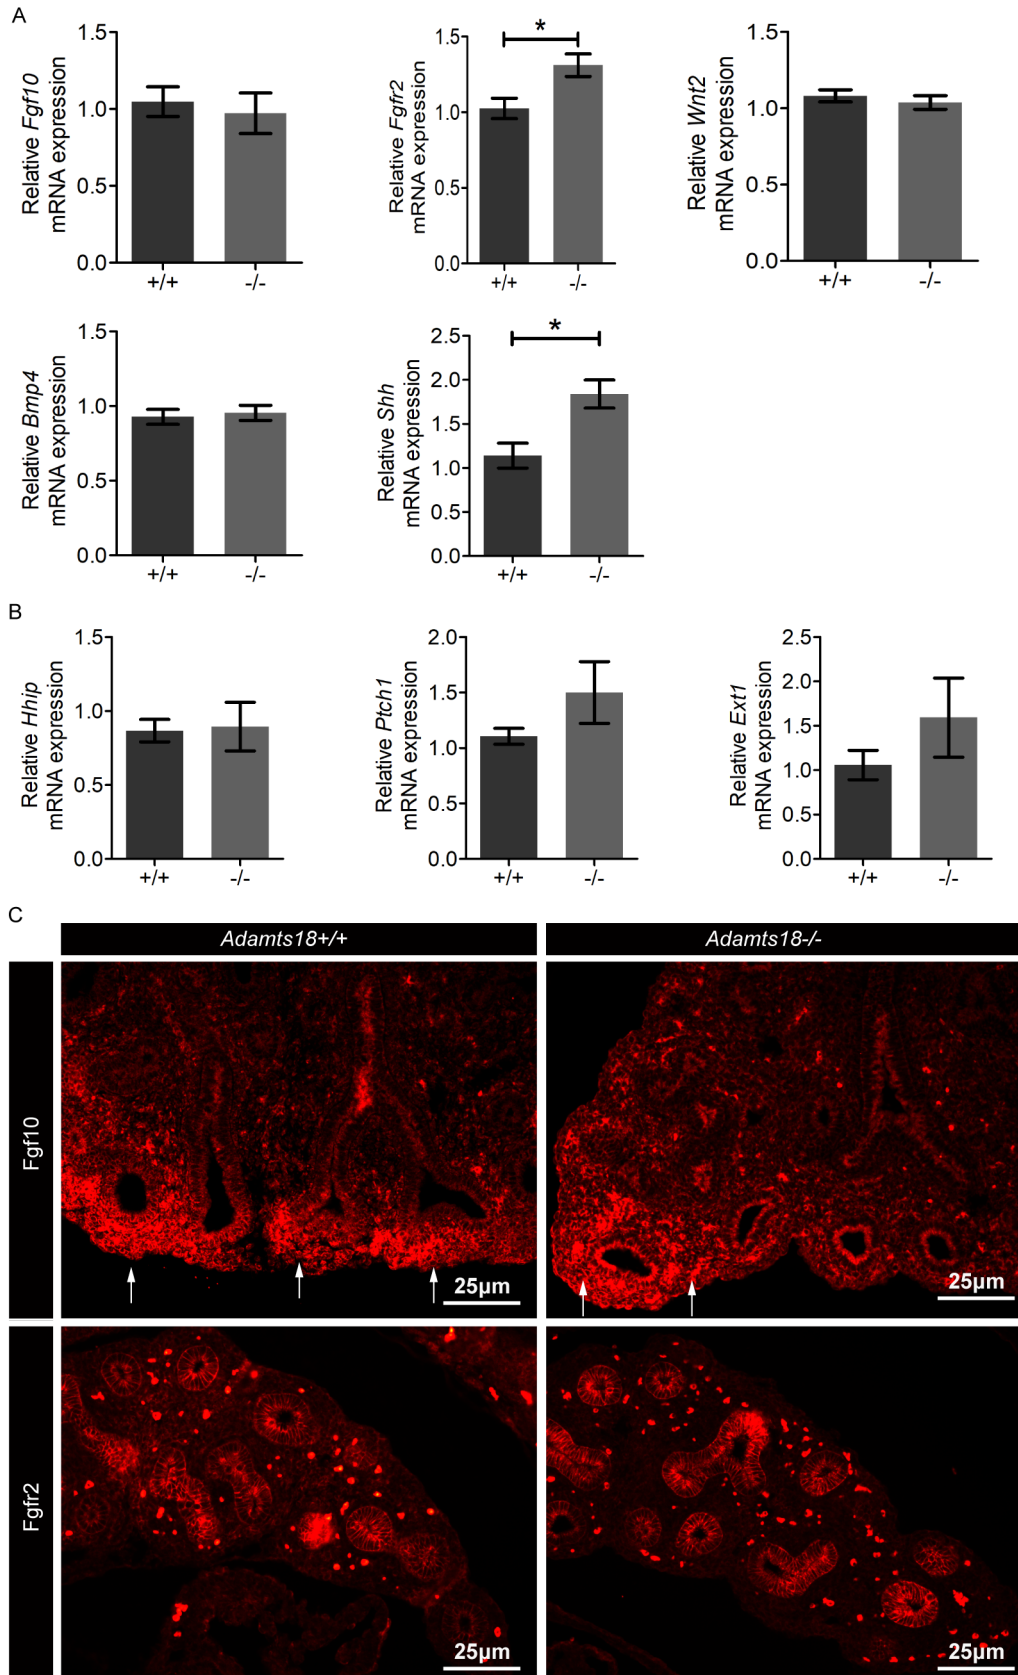

**Figure S2. FGF10, Wnt2, Bmp4 and Shh signaling activity in the lungs of *Adamts18*<sup>+/+</sup> and *Adamts18*<sup>-/-</sup> mice, related to Figure 2, Table S4 and S5. A-B) Relative mRNA levels of *Fgf10*, *Fgfr2*, *Wnt2*, *Bmp4*, *Shh*, *Hhip*, *Ptch1*, and *Ext1***

determined by *q*RT-PCR. The relative quantity of target mRNA was normalized to that of the housekeeping gene *Gapdh* using the  $\Delta\Delta C_t$  method. Data are expressed as mean  $\pm$  SEM. C) Representative immunostaining images of Fgf10 and Fgfr2 in E14.5 lungs from *Adamts18*<sup>+/+</sup> and *Adamts18*<sup>-/-</sup> mice. Scale bar, 25  $\mu$ m.

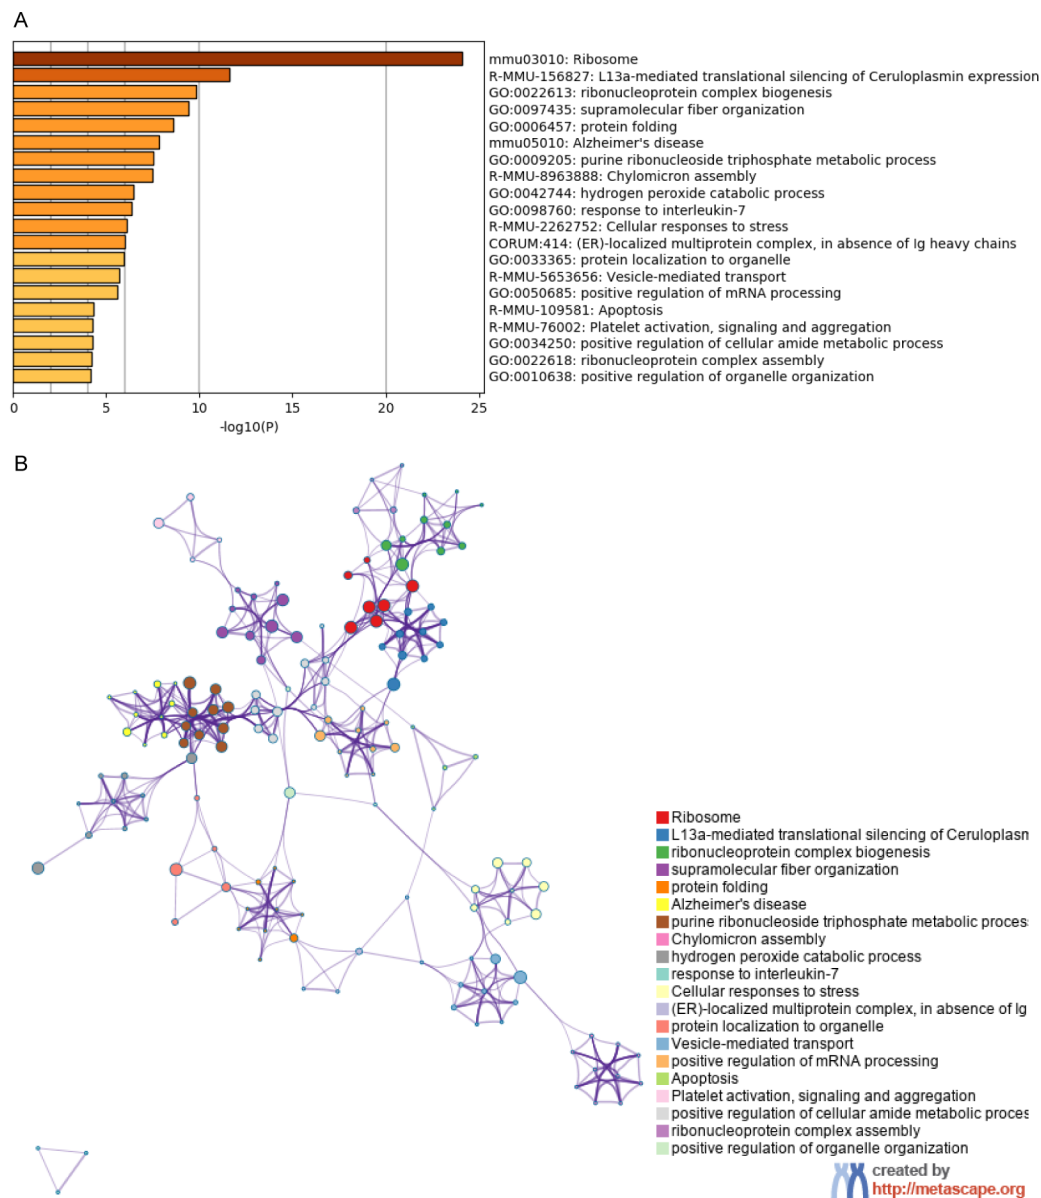

**Figure S3. Related to Figure 6. A) Gene ontology (GO) term and pathway analysis. B) Protein-protein interactome network analysis of differentially expressed proteins by Metascape.**

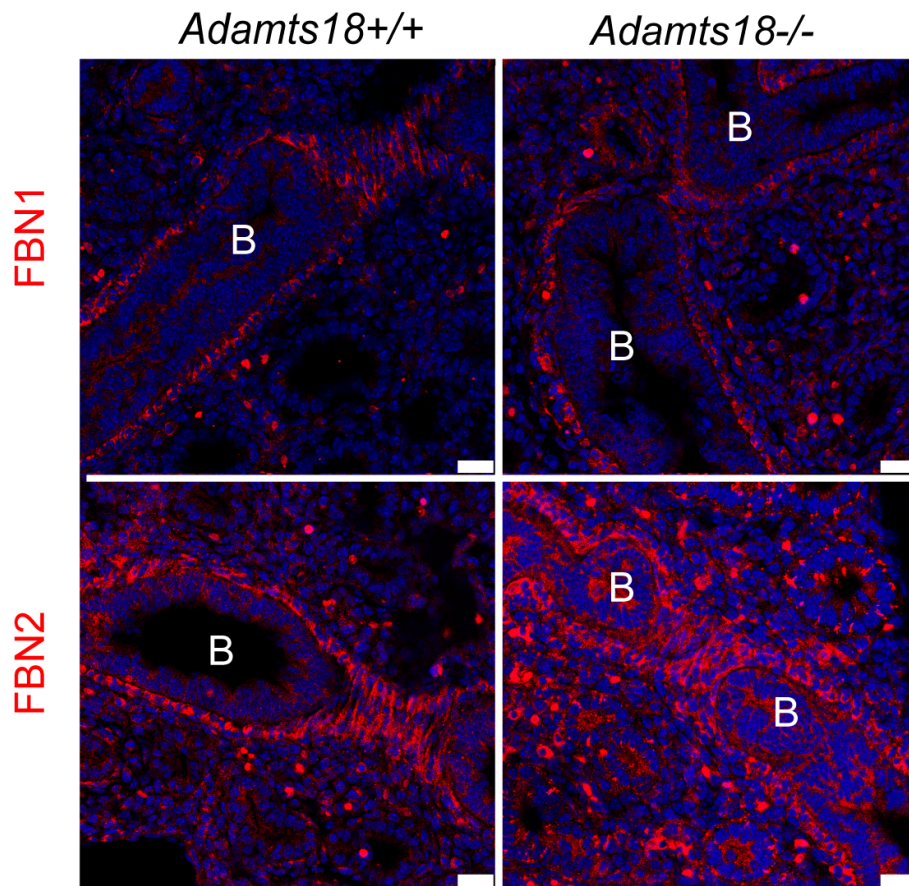

**Figure S4. Immunohistochemical localization of fibrillin1 (FBN1) and FBN2 around E14.5 large airways, related to Figure 6 and Table S4. B: bronchi. Scale bar = 200  $\mu$ m.**

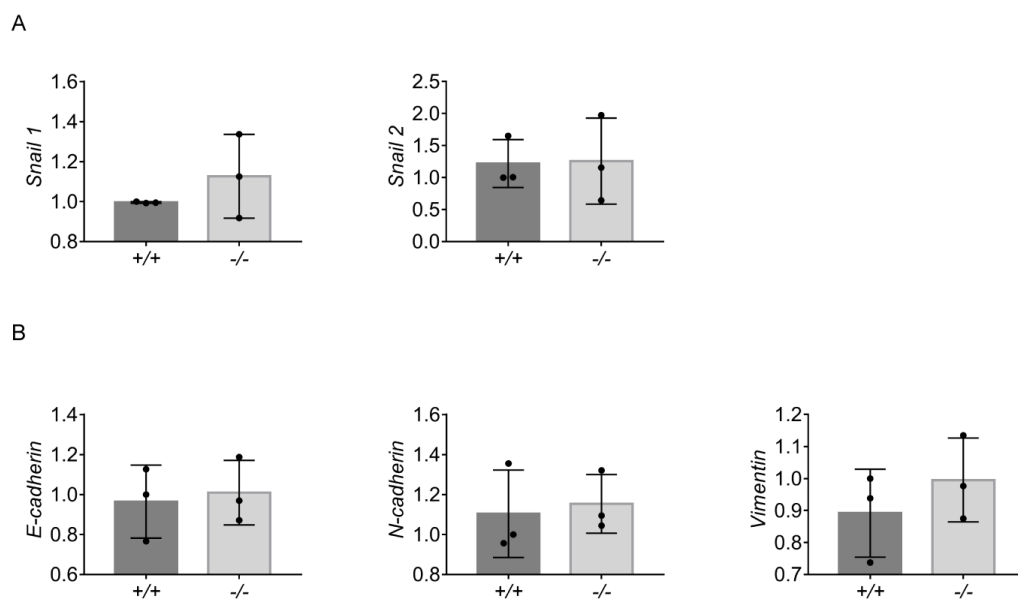

**Figure S5. Epithelial–mesenchymal transition (EMT) signaling in the lungs of**

***Adamts18*<sup>+/+</sup> and *Adamts18*<sup>-/-</sup> mice, related to Figure S3 and Table S5. A-B).**  
Relative mRNA levels of *Snail 1*, *Snail 2* (A), *E-cadherin* (*Cdh1*), *N-cadherin* (*Cdh2*), and *Vimentin* (*Vim*) (B) Determination of mRNA levels by qRT-PCR. The relative quantity of target mRNA was normalized to that of the housekeeping gene *Gapdh* using the  $\Delta\Delta C_t$  method. Data are expressed as mean  $\pm$  SEM.

## Supplemental Tables

**Table S1.** Lung functions of 12-week-old mice, related to Figure 3.

|                               | Male                                     |                                          |            | Female                                   |                                          |            |
|-------------------------------|------------------------------------------|------------------------------------------|------------|------------------------------------------|------------------------------------------|------------|
|                               | <i>Adamts18<sup>+/+</sup></i><br>(n = 6) | <i>Adamts18<sup>-/-</sup></i><br>(n = 6) | P<br>value | <i>Adamts18<sup>+/+</sup></i><br>(n = 6) | <i>Adamts18<sup>-/-</sup></i><br>(n = 6) | P<br>value |
| Ti (s)                        | 0.23 ± 0.03                              | 0.23 ± 0.08                              | 0.95       | 0.33 ± 0.09                              | 0.31 ± 0.11                              | 0.94       |
| Te (s)                        | 0.12 ± 0.01                              | 0.12 ± 0.02                              | 0.73       | 0.12 ± 0.01                              | 0.15 ± 0.04                              | 0.59       |
| f/min                         | 172.16 ± 22.60                           | 184.98 ± 57.09                           | 0.62       | 136.67 ± 22.87                           | 143.62 ± 53.72                           | 0.78       |
| Phigh<br>(cmH <sub>2</sub> O) | 25.89 ± 0.34                             | 25.81 ± 6.15                             | 0.75       | 26.91 ± 0.63                             | 27.26 ± 0.53                             | 0.33       |
| Pmean<br>(cmH <sub>2</sub> O) | 6.20 ± 0.08                              | 6.15 ± 0.13                              | 0.45       | 6.42 ± 0.15                              | 6.50 ± 0.15                              | 0.42       |
| TVb (μL)                      | 1.4 ± 0.2                                | 1.6 ± 0.2                                | 0.31       | 1.1 ± 0.2                                | 1.3 ± 0.2                                | 0.18       |
| MVb (mL)                      | 0.24 ± 0.05                              | 0.30 ± 0.13                              | 0.37       | 0.15 ± 0.04                              | 0.19 ± 0.10                              | 0.42       |
| PIF/PEF<br>(mL/s)             | 0.0111 ±                                 | 0.0135 ±                                 | 0.43       | 0.0078 ±                                 | 0.0102 ±                                 | 0.11       |
|                               | 0.0021                                   | 0.0067                                   |            | 0.0012                                   | 0.0032                                   |            |

Ti: Time of inspiration; Te: time of expiration; f/min: frequency per minute; Phigh: airway pressure high; Pmean: airway pressure mean; TVb: tidal volume; MVb: minute volume; PIF/PEF: peak inspiratory/expiratory flow.

**Table S2.** 43 proteins involved in supramolecular fiber organization, related to Figure 8.

| NO. | Genes    | Protein Description                         | UniProtIds | Fold<br>(5 <i>Adamts18</i> <sup>-/-</sup><br>/5 <i>Adamts18</i> <sup>+/+</sup> ) | P Value | AVG<br>Ratio |
|-----|----------|---------------------------------------------|------------|----------------------------------------------------------------------------------|---------|--------------|
| 1   | Tmsb10   | Thymosin beta-10                            | Q6ZWY8     | 0.303                                                                            | 0.029   | 1.723        |
| 2   | Rpl13a   | 60S ribosomal protein L13a                  | P19253     | 0.691                                                                            | <0.001  | 0.533        |
| 3   | Fbn2     | Fibrillin-2                                 | Q61555     | 1.401                                                                            | <0.001  | 0.486        |
| 4   | Fbn1     | Fibrillin-1                                 | Q61554     | 1.295                                                                            | 0.001   | 0.373        |
| 5   | Pfdn1    | Prefoldin 1                                 | Q9CQF7     | 0.779                                                                            | 0.046   | 0.360        |
| 6   | Col1a2   | Collagen alpha-2(I) chain                   | Q01149     | 1.283                                                                            | 0.037   | 0.360        |
| 7   | Col3a1   | Collagen alpha-1(III) chain                 | P08121     | 1.270                                                                            | 0.018   | 0.345        |
| 8   | Tpm3     | Tropomyosin alpha-3 chain                   | D3Z6I8;    | 0.824                                                                            | <0.001  | 0.279        |
| 9   | ApoE     | Apolipoprotein E                            | P08226     | 0.825                                                                            | 0.021   | 0.278        |
| 10  | Dpysl3   | Dihydropyrimidinase-related protein 3       | E9PWE8     | 1.195                                                                            | 0.049   | 0.257        |
| 11  | Apoa1    | Apolipoprotein A-I                          | Q00623     | 0.837                                                                            | 0.009   | 0.257        |
| 12  | Arpc3    | Actin-related protein 2/3 complex subunit 3 | Q9JM76     | 0.863                                                                            | 0.013   | 0.213        |
| 13  | Clu      | Clusterin                                   | Q06890     | 1.150                                                                            | 0.024   | 0.202        |
| 14  | Rpl4     | 39S ribosomal protein L41, mitochondrial    | Q9CQN7     | 1.128                                                                            | <0.001  | 0.174        |
| 15  | Lars     | Leucine-tRNA ligase, cytoplasmic            | Q8BMJ2     | 0.890                                                                            | 0.046   | 0.168        |
| 16  | Arl2     | ADP-ribosylation factor-like protein 2      | Q9D0J4     | 0.891                                                                            | 0.027   | 0.167        |
| 17  | Hist1h1b | Histone H1.5                                | P43276     | 0.894                                                                            | 0.001   | 0.162        |
| 18  | Serpinf2 | Alpha-2-antiplasmin                         | Q61247     | 0.909                                                                            | 0.034   | 0.138        |
| 19  | Vim      | Vimentin                                    | P20152     | 0.916                                                                            | 0.017   | 0.127        |
| 20  | Dync1h1  | Cytoplasmic dynein 1 heavy chain 1          | Q9JHU4     | 0.918                                                                            | 0.022   | 0.123        |
| 21  | Apoa4    | Apolipoprotein A-IV                         | P06728     | 0.924                                                                            | 0.029   | 0.114        |
| 22  | Psmc4    | 26S proteasome regulatory subunit 6B        | P54775     | 0.925                                                                            | 0.019   | 0.112        |
| 23  | Hsp90ab1 | Heat shock protein HSP 90-beta              | P11499     | 0.932                                                                            | 0.024   | 0.102        |
| 24  | Sptan1   | Spectrin alpha chain, non-erythrocytic 1    | P16546     | 0.933                                                                            | 0.002   | 0.100        |
| 25  | Rdx      | Radixin                                     | P26043     | 0.934                                                                            | 0.012   | 0.099        |
| 26  | Krt8     | Keratin, type II                            | P11679     | 0.938                                                                            | 0.048   | 0.092        |



|    |          |                                                       |                |       |       |       |  |
|----|----------|-------------------------------------------------------|----------------|-------|-------|-------|--|
|    |          | cytoskeletal 8                                        |                |       |       |       |  |
| 27 | Hsp90b1  | Endoplasmin                                           | P08113         | 0.940 | 0.001 | 0.089 |  |
| 28 | Add1     | Alpha-adducin                                         | Q9QYC0         | 1.057 | 0.014 | 0.080 |  |
| 29 | Serpinh1 | Serpin H1                                             | P19324         | 0.952 | 0.001 | 0.071 |  |
| 30 | Actn4    | Alpha-actinin-4                                       | P57780         | 0.953 | 0.014 | 0.069 |  |
| 31 | Ran      | GTP-binding nuclear protein Ran                       | P62827         | 0.959 | 0.020 | 0.060 |  |
| 32 | Farp1    | FERM, ARHGEF and pleckstrin domain-containing protein | F8VPU2         | 0.959 | 0.027 | 0.060 |  |
| 33 | Myh10    | Myosin-10                                             | Q3UH59         | 0.964 | 0.017 | 0.053 |  |
| 34 | Atp2a2   | Sarcoplasmic/endoplasmic reticulum calcium ATPase 2   | O55143         | 1.035 | 0.044 | 0.050 |  |
| 35 | Rock2    | Rho-associated protein kinase 2                       | A0A1Y7V<br>MN0 | 1.034 | 0.040 | 0.048 |  |
| 36 | Acta2    | Actin, aortic smooth muscle                           | P62737         | 0.968 | 0.008 | 0.047 |  |
| 37 | Mapk1    | Mitogen-activated protein kinase 1                    | P63085         | 0.972 | 0.044 | 0.041 |  |
| 38 | Hspa8    | Heat shock cognate 71 kDa protein                     | P63017         | 0.981 | 0.016 | 0.028 |  |
| 39 | Kif2c    | Kinesin-like protein KIF2C                            | Q922S8         | 0.984 | 0.038 | 0.023 |  |
| 40 | Hist1h1d | Histone H1.3                                          | P43277         | 0.984 | 0.001 | 0.023 |  |
| 41 | Map1b    | Microtubule-associated protein 1B                     | P14873         | 1.016 | 0.013 | 0.023 |  |
| 42 | Sec24b   | Sec24-related gene family, member B (S. cerevisiae)   | Q80ZX0         | 0.986 | 0.05  | 0.020 |  |
| 43 | Arhgef2  | Rho guanine nucleotide exchange factor 2              | H3BJ40         | 0.99  | 0.044 | 0.014 |  |

---

AVG: Absolute value of Log2

**Table S3.** Quantification of important ECM proteins involved in branching morphogenesis in E14.5 lungs, related to Figure 6.

| UniProtIds | Gene   | Protein Description         | mRNA                                                                           |                                                                                | Protein                                                                        | Subcellular Location |
|------------|--------|-----------------------------|--------------------------------------------------------------------------------|--------------------------------------------------------------------------------|--------------------------------------------------------------------------------|----------------------|
|            |        |                             | H*<br>(3 <i>Adamts18</i> <sup>-/-</sup><br>/2 <i>Adamts18</i> <sup>+/+</sup> ) | J*<br>(3 <i>Adamts18</i> <sup>-/-</sup><br>/3 <i>Adamts18</i> <sup>+/+</sup> ) | MS<br>(5 <i>Adamts18</i> <sup>-/-</sup><br>/5 <i>Adamts18</i> <sup>+/+</sup> ) |                      |
| P11087     | Col1a1 | Collagen alpha-1(I) chain   | 1.01                                                                           | 1.07                                                                           | 1.36                                                                           | Extracellular matrix |
| Q01149     | Col1a2 | Collagen alpha-2(I) chain   | 0.96                                                                           | 1.14                                                                           | 1.28<br>(p = 0.037)                                                            | Extracellular matrix |
| P08121     | Col3a1 | Collagen alpha-1(III) chain | 1.01                                                                           | 1.10                                                                           | 1.27<br>(p = 0.018)                                                            | Extracellular matrix |
| P11276     | Fn1    | Fibronectin                 | 1.22                                                                           | 1.23                                                                           | 0.93                                                                           | Extracellular matrix |
| P19137     | Lama1  | Laminin subunit alpha-1     | 1.25<br>(p = 0.022)                                                            | 1.36                                                                           | 0.82                                                                           | Basement membrane    |
| Q61789     | Lama3  | Laminin subunit alpha-3     | 1.60<br>(p = 0.014)                                                            | 1.64<br>(p = 0.016)                                                            | 0.75                                                                           | Basement membrane    |
| Q61001     | Lama5  | Laminin subunit alpha-5     | 1.17                                                                           | 1.53                                                                           | 0.89                                                                           | Basement membrane    |
| P02469     | Lamb1  | Laminin subunit beta-1      | 1.29<br>(p = 0.008)                                                            | 1.29<br>(p = 0.015)                                                            | 0.97                                                                           | Basement membrane    |
| P02468     | Lamc1  | Laminin subunit gamma-1     | 1.32<br>(p = 0.042)                                                            | 1.26                                                                           | 0.98                                                                           | Basement membrane    |
| Q3V3R4     | Itga1  | Integrin alpha-1            | 0.92                                                                           | 1.28                                                                           | 1.09                                                                           | Membrane             |
| Q62469     | Itga2  | Integrin alpha-2            | 1.15                                                                           | 1.19                                                                           | 1.06                                                                           | Membrane             |

|        |       |                                              |      |                      |      |                      |
|--------|-------|----------------------------------------------|------|----------------------|------|----------------------|
| Q62470 | Itga3 | Integrin alpha-3                             | 1.12 | 1.24                 | 0.99 | Membrane             |
| P43406 | Itgav | Integrin alpha-v                             | -    | 0.98                 | 0.99 | Membrane             |
| Q61739 | Itga6 | Integrin alpha-6                             | 0.95 | 1.37                 | 1.11 | Membrane             |
| P09055 | Itgb1 | Integrin beta-1                              | -    | 0.94                 | 0.99 | Membrane             |
| A2A863 | Itgb4 | Integrin beta-4                              | 0.81 | 1.77                 | -    | Membrane             |
| P18828 | Sdc1  | Syndecan-1                                   | 1.21 | -                    | -    | Extracellular matrix |
| O35988 | Sdc4  | Syndecan-4                                   | 1.10 | -                    | -    | Extracellular matrix |
| Q62165 | Dag1  | Dystroglycan                                 | 1.10 | 1.28*<br>(P = 0.050) | 1.3  | Basement membrane    |
| P10493 | Nid1  | Nidogen-1                                    | 1.18 | 1.27<br>(P = 0.007)  | 0.99 | Basement membrane    |
| P33434 | Mmp2  | 72 kDa type IV collagenase                   | 0.78 | -                    | 0.97 | Extracellular matrix |
| P29268 | Ctgf  | CCN family member 2                          | 0.92 | 1.51<br>(P = 0.036)  | -    | Extracellular matrix |
| P04202 | Tgfb1 | Transforming growth factor beta-1 proprotein | 0.84 | 1.02                 | -    | Extracellular matrix |

\*H and J represent mice from two different littermates.

“-”: mean data unavailable because of limited quantity of samples in real-time *q*PCR experiments or undetectable in MS analysis.

**Table S4.** Antibodies used in this study, related to Figure 4, 6, 8, S2, and S4.

| Name                             | Catalog number | Company                 | Application (dilution) |
|----------------------------------|----------------|-------------------------|------------------------|
| Anti-MYC                         | TA150121       | Origene                 | ICC (1:100)            |
| Anti-Fibrillin1                  | Ab53076        | Abcam                   | ICC (1:100)            |
| Anti-DDK                         | TA150078       | Origene                 | WB (1:5000)            |
| Anti-FBN1-C terminal             | LS-C358981     | LifeSpan Bioscience     | WB (1:400)             |
| Anti-FBN2                        | Sc-393968      | Santa Cruze             | WB (1:200)             |
| Anti-FBN2                        | 20252-1-AP     | Proteintech             | IHC (1:200)            |
| Anti-FAK                         | AF6397         | Affinity                | IHC (1:100)            |
| Anti-PFAK(Tyr397)                | AF3398         | Affinity                | IHC (1:100)            |
| Anti-TMSB10                      | TA351779       | Origene                 | IHC (1:50)             |
| Anti-Fgfl0                       | GTX55619       | Genetex                 | IHC (1:100)            |
| Anti-Fgfr2                       | 23328          | CST                     | IHC (1:200)            |
| Anti-CD11b                       | Ab133357       | Abcam                   | IHC (1:2000)           |
| Anti-MPO                         | AF3667         | R&D system              | IHC (1:40)             |
| Anti-Histone H3                  | NB100-57135    | Novus                   | IHC (1:200)            |
| CY <sup>TM</sup> 3 Affinity Goat | 112-165-003    | Jackson Immuno Research | IHC/ICC (1:200)        |
| Anti-Rat IgG                     |                |                         |                        |
| CY <sup>TM</sup> 3 Affinity Goat | 111-165-003    | Jackson Immuno Research | IHC/ICC (1:200)        |
| Anti-Rabbit IgG                  |                |                         |                        |
| Alexa Fluor 488 Donkey           | 705-545-147    | Jackson Immuno Research | IHC (1:200)            |
| Anti-Rabbit IgG                  |                |                         |                        |
| Alexa Fluor 647 Donkey           | 711-605-152    | Jackson Immuno Research | IHC (1:200)            |
| Anti-Goat IgG                    |                |                         |                        |

**Table S5.** Primers for quantitative real-time RT-PCR (*q*RT-PCR), related to Figure 1, 4, 5, 6, S1, S2, and S5.

| Gene            | Forward<br>(5' to 3')    | Reverse<br>(5' to 3')      |
|-----------------|--------------------------|----------------------------|
| <i>Gapdh</i>    | GTGGAGTCATACTGGAACATGTAG | AATGGTGAAGGTCGGTGTG        |
| <i>Adamts18</i> | CCTCAAGTTGTCTGCTCCATCA   | GCTGAAGAAATCCACGCAAGA      |
| <i>Fbn1</i>     | GCCAGAAAGGGTACATCGG      | ACACACCTCCCTCCGTT          |
| <i>Fbn2</i>     | GTGAAACCACACAGAAATGTGAA  | GAACAGTCGCCAGTCTCAC        |
| <i>Eln</i>      | CTGCTGCTAAGGCTGCTAAG     | CCACCAACACCAGGAATGC        |
| <i>Lox</i>      | TCTTCTGCTGCGTGACAACC     | GAGAAACCAGCTTGGAAACCAG     |
| <i>Fbln4</i>    | CTCTGGGCGTTCCTGCTGTT     | GCCATCTGTGCATTCCGTTGT      |
| <i>Fbln5</i>    | GGGCTCATACTTCTGCTCG      | GATGGTGAATGGCTGGTCT        |
| <i>Tgfb1</i>    | CTCCCGTGGCTTCTAGTGC      | GCCTTAGTTTGGACAGGATCTG     |
| <i>Ltbp1</i>    | GGTTATTTGCCATCTTCCGTGTA  | GAAATTTGGAGGGCACTGACA      |
| <i>Itgav</i>    | GGCACAAGACCGTTGAGTA      | ACCAGGACCACCGAGAAGTA       |
| <i>Itgb3</i>    | AGGGCAGTCCTCTATGTGGT     | CTTGGCTCTGGCTCGTTCT        |
| <i>Mmp2</i>     | GACCATGCGGAAGCCAAGA      | TGTGTAACCAATGATCCTGTATGTG  |
| <i>Mmp12</i>    | CACAGGAGGAACTATGAGTAGCA  | AGGCAGACCAGGACACAGA        |
| <i>Coll1a1</i>  | CGGTGCTACTGGAGTTCAAGGT   | CAGGGAAACCACGGCTACCA       |
| <i>Col3a1</i>   | CCACAAGGATTACAAGGCATAACC | TCCAGGAGCACCGACTTCA        |
| <i>Col4a1</i>   | AATGGCATTGTGGAGTGTCAAC   | TTCTGTCCAACCTCACCTGTCAA    |
| <i>Fgf10</i>    | TCCGTACAGTGTCTGGAGATA    | CCCTTCTTGTTTCATGGCTAAGTAAT |
| <i>Fgfr2</i>    | CGCTTCATCTGCCTGGTCTTG    | ACGGTGCTCCTTCTGGTTCTAA     |
| <i>Wnt2</i>     | CCTGATGAACCTTCACAACAACA  | GCCACTCACACCATGACACT       |
| <i>Bmp4</i>     | AGCCCGCTTCTGCAGGA        | AAAGGCTCAGAGAAGCTGCG       |
| <i>Shh</i>      | CTCCGAACGATTTAAGGAACTCAC | GCCACTGGTTCATCACAGAGAT     |
| <i>Hhip</i>     | GGAGCCTTACTTGGACATTAC    | CCGTTCCCTGGTTGGTGGTAT      |
| <i>Ptch1</i>    | CTCAGGCAATACGAAGCACAG    | GGAGGCTGATGTCTGGAGTC       |
| <i>Ext1</i>     | GTTGCCATTCTCCGAAGTGATT   | TGTGTCTGCTGTCTAAGTGCTA     |
| <i>Colla2</i>   | CGATGTTGAACTTGTTGCTGAG   | GGCAGGCGAGATGGCTTAT        |
| <i>Fn1</i>      | AAGAGAAGACAGGACCAATGAA   | TTGAGAGCATAGACACTGACTT     |
| <i>Lama1</i>    | GCTATCCTGCCACATCAAAC     | CAAGGACTGCACTTGTGAGC       |
| <i>Lama3</i>    | CTCCAATGACCTCAGTCCAGAA   | TCTCAGAACGATGCGGAACA       |
| <i>Lama5</i>    | TTGGAGAATGGCGAGATTGTG    | CGAAGTAACGGTGAGTAGGAGA     |
| <i>Lamb1</i>    | TCTGTGAACCATGTACCTGTGA   | GACACTGACCAGCAATGAGAC      |
| <i>Lamc1</i>    | TGCCGCCAATGTGTCAATC      | TGCCACTCGTACAATGTCATC      |
| <i>Sdc1</i>     | CTGGAGAACAAGACTTCACCTT   | AGCACTTCCTTCCTGTCCAA       |
| <i>Sdc4</i>     | ACCTCCTGGAAGGCAGATACT    | GGCACCAAGGGCTCAATCA        |
| <i>Dagl1</i>    | GAGTGAGCATTCCAACGGATT    | CAGTGTAGCCAAGACGGTAAG      |
| <i>Ctgf</i>     | AAGGACCGCACAGCAGTT       | AGTTGGCTCGCATCATAGTTG      |
| <i>Nid1</i>     | AGAGCAACGGAGCCTATAACAT   | CGGTAGCAGGACTTCCAATCT      |
| <i>Itga1</i>    | CGGCTTCAGTGCTCATTATTCA   | ATGACCACAGTTCCGTTCCA       |
| <i>Itga2</i>    | CGCAAGAGACTACGCTTATTCA   | CTCGCCATCGGTCACAACCT       |
| <i>Itga3</i>    | AGAGACACATTGCCAGACACT    | CGCAGAGGTAAGGAGTAGTTCA     |

---

|               |                        |                        |
|---------------|------------------------|------------------------|
| <i>Itga6</i>  | TCTCGTTCCTTCGTTCCAGGTT | GCAGCAGCGGTGACATCTA    |
| <i>Itgb1</i>  | TGGTCAGCAACGCATATCTG   | GTTACATTCCTCCAGCCAATCA |
| <i>Itgb4</i>  | GACCAATGGCGAGATCACAG   | TCCACGAGCACCTTCTTCATA  |
| <i>Snail1</i> | GTCTGCACGACCTGTGGAAA   | GGTCAGCAAAAGCACGGTTG   |
| <i>Snail2</i> | TCATCCTTGGGGCGTGTAAG   | GATGGCATGGGGGTCTGAAA   |
| <i>Cdh1</i>   | CAGCCGGTCTTTGAGGGATT   | TGACGATGGTGTAGGCGATG   |
| <i>Cdh2</i>   | ACAGCGCAGTCTTACCGAAG   | CTTGAAATCTGCTGGCTCGC   |
| <i>Vim</i>    | TTCTCTGGCACGTCTTGACC   | GCTTGAAACGTCCACATCG    |

---

## Transparent Methods

### *Reagents*

All reagents were purchased from Sigma–Aldrich (St. Louis, MO, USA) unless otherwise indicated. Primary antibodies used in this study are listed in Table S4.

### *Animals*

*Adamts18* knockout (*Adamts18<sup>-/-</sup>*) and wildtype (*Adamts18<sup>+/+</sup>*) mice with the C57BL/6/129Sv background were generated and genotyped as previously described (Lu et al., 2017). Animals were maintained on a 12-h light/dark schedule (lights on at 06:00) in a specific pathogen-free facility. All procedures for animal experiments were approved by the Institutional Animal Care and Use Committee of East China Normal University (ECNU).

### *RNA in situ hybridization*

RNA in situ hybridization (ISH) was performed as described previously (Zhu et al., 2019). Briefly, mouse lungs were fixed in 10% neutral buffered formalin for 24 h at room temperature (RT) and paraffin-embedded following standard methods. ISH was performed on 5- $\mu$ m-thick sections using the RNAscope 2.5 HD Reagent Kit-RED (Advanced Cell Diagnostics, Hayward, CA). Specific probes were used to detect target mRNAs as described (Zhu et al., 2019).

### *Quantitative Real-Time RT-PCR Analysis*

Quantitative real-time RT-PCR (*qRT-PCR*) was performed using the Step One Plus real-time PCR system (ThermoFisher, Carlsbad, CA) with SuperReal PreMix Plus (SYBR Green; TIANGEN). Primers used are listed in Table S5. The relative quantity of target mRNA was determined using the  $\Delta\Delta Ct$  method, with *Gapdh* as the reference gene. All reactions were performed in triplicates.

### *Explant cultures*

Lung explant cultures were performed as previously described (Moral and Warburton, 2009). Briefly, E11.5 lungs were cultured on Nucleopore polycarbonate track-etch membranes (WHA-110414, Whatman) at 37°C in a 5% CO<sub>2</sub> incubator for 72 h. For the rescue experiments, sense and antisense-phosphorothioated oligodeoxynucleotides (SODN and ASODN) were synthesized and added to the culture medium at the concentration of 0.5  $\mu$ M for *Fbn1* or 1  $\mu$ M for *Fbn2* (Kanwar et al., 1998; Yang et al., 1999). Sequences of the oligonucleotides are as follows: *Fbn1* sense ODN: 5'-GCCAGCGCGACCTCCAGCAGCCCTCCTCGCCGCAT-3', *Fbn1* antisense ODN: 5'-ATGCGGCGAGGAGGGCTGCTGGAGGTCGCGCTGGC-3', *Fbn2* sense ODN: 5'-CTCGGAGTATTTCCCTGCTGTCCCTCGCCTGCGGAC-3', *Fbn2* antisense ODN: 5'-GTCCGCAGGCGAGGACAGCAGGAAATACTCCGAG-3'. The culture medium was refreshed every 24 h. Images of explants were taken using an Mshot microscope with MS60 camera (Guangzhou, China). The number of branches was counted manually, and the length of each airway was calculated by the software Image Pro

Plus 6.0 (IPP, Media Cybernetics, Inc., Silver Spring, MD, USA).

#### *Lung cast*

Mice were euthanized by CO<sub>2</sub> asphyxiation. The trachea was exposed just below the larynx, and a catheter was inserted and securely tied with braided silk surgical suture. The lungs were inflated with casting agent (90 ml ethyl acetate, 10 g polyvinyl chloride, 2.7 ml dibutyl phthalate, and appropriate amount of oil paints), separated from trachea, and transferred to a 60°C oven. After the casting agent was solidified, the lungs were immersed in 50% HCl to remove tissues (only airways left). Airways were imaged using an Mshot microscope.

#### *Histology, immunohistochemistry, and immunofluorescence*

Lung tissues were fixed in 10% neutral buffered formalin and embedded in paraffin. After dewaxing and rehydration, hematoxylin and eosin (HE) staining or Hart's staining was performed on 5- $\mu$ m sections to determine radial alveolar counts (RAC) and elastin distribution. Immunohistochemical staining of sections was performed using anti-CD11b, anti-histone H3, anti-MPO, anti-FBN1, anti-FBN2, anti-PFAK (Tyr397), anti-FAK, anti-TMSB10, anti-FGF10, and anti-FGFR2 antibodies. For immunofluorescence examination, 48 h after transfection, the cells were fixed with pre-cooled ethanol for 20 min. The samples were incubated with anti-ddk (or anti-myc), anti-fibrillin1, and anti-fibrillin2 antibodies overnight at 4°C, followed by incubation with the secondary antibody. Samples were counterstained with DAPI (MP, Carlsbad, CA) and imaged with a Leica SP8 confocal microscope (Leica Microsystems, Wetzlar, Germany).

#### *FITC-phalloidin staining*

E14.5 lung tissues were obtained, embedded in optimal cutting temperature (OCT) compound, and cut into 10- $\mu$ m thick sections with a Leica CM3050 S cryostat microtome (Leica Biosystem, Wetzlar, Germany). The sections were fixed for 15 min with 4% formaldehyde in PBS and permeabilized with 0.5% triton X-100 in PBS for 20 min, followed by incubation with 0.1 mg/ml FITC-phalloidin diluted in PBS containing 1% BSA at 37°C for 2 h and counterstaining with DAPI. After mounting on slides, the sections were examined with a Leica SP8 confocal microscope.

#### *Lung function examination*

Mice were anesthetized with a mixture of urethane (14% m/v), alpha-chloralose (0.7% m/v), and sodium tetraborate decahydrate (0.7% m/v) in saline and connected to a computer-controlled ventilator via the tracheal cannula. After normal respiratory movements were recorded, mice were mechanically ventilated with room air at 110 breaths per min with the expiration/inspiration ratio of 20:10. Pulmonary function tests were performed using the AniRes2005 Lung Function System (Bestlab Technology Co., Ltd).

#### *LPS-induced acute lung injury*



Lipopolysaccharide (LPS) was diluted to a final concentration of 1 mg/ml in normal saline. Anesthetized mice were injected intraperitoneally (I.P.) with LPS at 10 mg/kg. Lung tissues were collected at different time points (0 h, 3 h, 6 h, 12 h, and 24 h) after LPS injection. Pathological grade of lung injury was defined as follows: Grade 0, normal alveoli, alveolar septum, and bronchi; Grade 1, partial alveolar septal congestion; Grade 2, moderate alveolar septal congestion and intra-alveolar hemorrhage; Grade 3, severe congestion and bleeding in alveolar septum and alveoli. Frozen lung tissues (around 30 mg) were homogenized to measure IL-6 using a commercially available ELISA kits (LYBD Bio-Technique Co, Ltd, Beijing, China), and data were normalized to protein concentration measured by the bicinchoninic acid (BCA) method.

#### *Bronchoalveolar lavage*

Mice were sacrificed by CO<sub>2</sub> asphyxiation and bronchoalveolar lavaged 3 times, each with 0.8 ml of PBS via a 22G catheter. The bronchoalveolar lavage fluid (BALF) was centrifuged at 400 xg for 7 min at 4°C, and the pellet was resuspended in 20 µl PBS containing 1% BSA. The resuspended cells were placed on a slide, dried, stained with Diff-Quick (Solarbio Life Science, Beijing, China), and counted under a microscope at 100x magnification.

#### *Bleomycin-induced lung fibrosis*

Mice were anesthetized and intratracheally instilled with 100 µl of saline or bleomycin sulfate dissolved in saline (1 mg/kg body weight), followed with 300 µl of air to ensure delivery to the distal airways. Mouse mortality was monitored for 25 days after bleomycin injection. To assess lung fibrosis, mice were sacrificed, and lung tissues were examined microscopically at 100 x magnification. The severity of fibrosis was determined according to the method of Ashcroft et al (Ashcroft et al., 1988) and scored as follows: grade 0, normal lung; grade 1, minimal fibrous thickening of alveolar or bronchiolar walls; grade 3, moderate thickening of walls without obvious damage to lung architecture; grade 5, increased fibrosis with definite damage to lung structure and formation of fibrous bands or small fibrous masses; grade 7, severe distortion of structure and large fibrous areas; grade 8, total fibrous obliteration.

#### *Proteomic analysis of embryonic lungs*

Whole lung tissues from E14.5 embryos were digested with sequencing grade trypsin (Promega) and fractionated with high PH reversed phase chromatography. The data-independent acquisition (DIA) analysis was performed on an Orbitrap Fusion LUMOS mass spectrometer (Thermo Fisher Scientific) connected to an Easy-nLC 1200 via an Easy Spray (Thermo Fisher Scientific). The DIA raw files were analyzed in Spectronaut X (Biognosys, Schlieren, Switzerland). Pathway enrichment analysis was performed with MetaScape (<http://metascape.org/>).

### *Transmission electron microscopy (TEM)*

Distal parts of E14.5 lungs were fixed with 2.5% glutaraldehyde at 4°C, followed by fixation with osmium tetroxide, dehydration in alcohol, embedding in plastic, ultra-thin sectioning, flotation of the sections on aqueous medium, and staining with uranyl acetate and lead acetate. Images were taken with a Tecnai G2 Spirit BioTWIN transmission electron microscope (FEI, Hillsboro, Oregon).

### *ADAMTS18 and fibrillin1 (FBN1) expression*

The plasmid for expression of Myc-DDK tagged mouse full-length *Adamts18* (pCMV6-*Adamts18*, the ORF clone with sequence NM\_172466 in pCMV6-Entry) was purchased from Origene (Rockville, MD). Plasmid DNA was introduced into HEK293T cells by transfection using Lipofectamine 2000 (Invitrogen/Life technologies, Carlsbad, CA).

### *Co-Immunoprecipitation (IP)*

Mouse dermal fibroblast cells (DFCs) and HEK293T cells were co-cultured and transiently transfected with pCMV6-*Adamts18* or empty vector. At 48 h, the cells were washed once with PBS and lysed in NP-40 buffer (50 mM Tris-base pH 7.5, 150 mM NaCl, 1% NP-400, and protease inhibitors). Cell lysates were incubated with anti-DDK agarose (TA150037, Origene, Rockville, MD) at 4°C overnight and washed with 1% NP40 washing buffer. The proteins eluted from the agarose beads were resolved by SDS-PAGE and analyzed by Western blotting with anti-fibrillin 1 C-terminal, anti-fibrillin 2, and anti-DDK (DYKDDDDK) primary antibodies and horseradish peroxidase (HRP)-conjugated secondary antibody. The immunoreactive bands were visualized with enhanced chemiluminescence (ECL) Western blot kit (Millipore, Boston, MA).

### *RhoA Activity*

RhoA activity was detected using the Rho Activation Assay Biochem Kit (Cytoskeleton, Inc, Dencer, CO). Briefly, E15.5 lung tissues were isolated and homogenized in the lysis buffer. The cell lysate thus obtained was adjusted to 1 mg/ml of protein and then incubated with rhotekin-RBD beads at 4°C for 1 h. RhoA was then eluted from the rhotekin-RBD beads and analyzed by Western blotting with anti-RhoA antibody included in the kit.

### *Statistics*

Data were analyzed by Student's *t* test or Log-rank (Mantel-Cox) test using the software package Prism version 7 (GraphPad, La Jolla, CA, USA). Data are shown as mean  $\pm$  SEM or mean  $\pm$  SD. A *p* value  $< 0.05$  was considered statistically significant.

### **Supplemental Reference**

Ashcroft, T., Simpson, J.M., and Timbrell, V. (1988). Simple method of estimating severity of pulmonary fibrosis on a numerical scale. *Journal of clinical pathology* 41, 467-470.

Kanwar, Y.S., Ota, K., Yang, Q., Kumar, A., Wada, J., Kashihara, N., and Peterson, D.R. (1998). Isolation of rat fibrillin-1 cDNA and its relevance in metanephric development. *The American journal of physiology* 275, F710-723.

Lu, T., Dang, S., Zhu, R., Wang, Y., Nie, Z., Hong, T., and Zhang, W. (2017). Adamts18 deficiency promotes colon carcinogenesis by enhancing beta-catenin and p38MAPK/ERK1/2 signaling in the mouse model of AOM/DSS-induced colitis-associated colorectal cancer. *Oncotarget* 8, 18979-18990.

Mei, S.H., McCarter, S.D., Deng, Y., Parker, C.H., Liles, W.C., and Stewart, D.J. (2007). Prevention of LPS-induced acute lung injury in mice by mesenchymal stem cells overexpressing angiopoietin 1. *PLoS medicine* 4, e269.

Moral, P.M.D., and Warburton, D. (2009). Explant culture of mouse embryonic whole lung, isolated epithelium, or mesenchyme under chemically defined conditions as a system to evaluate the molecular mechanism of branching morphogenesis and cellular differentiation. *Methods Mol Biol* 633, 71-79.

Yang, Q., Ota, K., Tian, Y., Kumar, A., Wada, J., Kashihara, N., Wallner, E., and Kanwar, Y.S. (1999). Cloning of rat fibrillin-2 cDNA and its role in branching morphogenesis of embryonic lung. *Dev Biol* 212, 229-242.

Zhu, R., Pan, Y.H., Sun, L., Zhang, T., Wang, C., Ye, S., Yang, N., Lu, T., Wisniewski, T., Dang, S., *et al.* (2019). ADAMTS18 Deficiency Affects Neuronal Morphogenesis and Reduces the Levels of Depression-like Behaviors in Mice. *Neuroscience* 399, 53-64.
